# Supplementary material for: The effects of chemical interactions and culture history on the colonization of structured habitats by competing bacterial populations
Source: PubMed Central journal article supplement (PMC4032360; doi:10.1186/1471-2180-14-116), 2014-05-07

**A**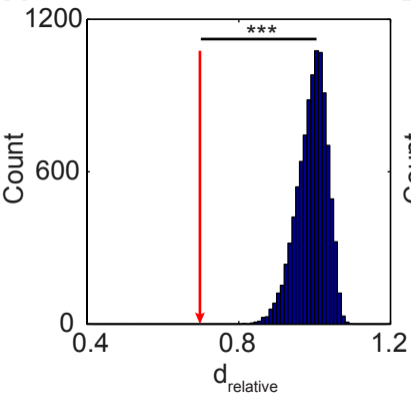**B**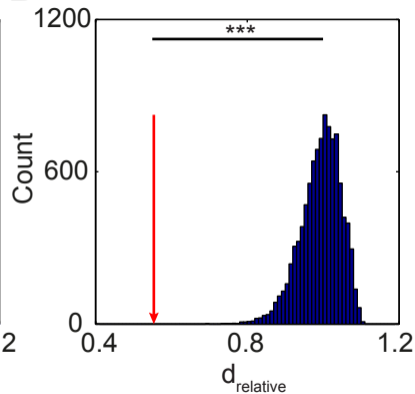**C**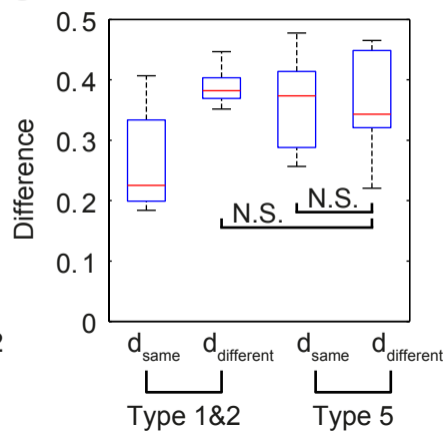

Supplement: 1471-2180-14-116-S9.pdf [file 1471-2180-14-116-S9.pdf]
